# Supplementary material for: Extending PTR based breath analysis to real-time monitoring of reactive volatile organic compounds
Source: Royal Society of Chemistry journal article supplement (doi:10.1039/c9an01478k), 2019-01-01
Supplement: c9an01478k1.pdf [file c9an01478k1.pdf]

# Extending PTR based breath analysis to real time monitoring of reactive volatile organic compounds

Giovanni Pugliese, Phillip Trefz, Beate Brock, Jochen K. Schubert, Wolfram Miekisch\*

Department of Anaesthesiology and Intensive Care, Rostock University Medical Center, Schillingallee 35, 18057 Rostock, Germany

\*Corresponding author: [wolfram.miekisch@uni-rostock.de](mailto:wolfram.miekisch@uni-rostock.de)

Department of Anaesthesiology and Intensive Care  
Rostock University Medical Center  
Schillingallee 35  
18057 Rostock, Germany  
Phone: +49 381 494 5965  
Fax: +49 381 494 5942

**Supplementary table 1.** List of compounds that showed end-tidal concentrations lower than the corresponding room air concentrations.

| m/z     | Sum Formula                                                   | Tentative Identification |
|---------|---------------------------------------------------------------|--------------------------|
| 45.033  | (C <sub>2</sub> H <sub>4</sub> O)H <sup>+</sup>               | Acetaldehyde             |
| 47.013  | (CH <sub>2</sub> O <sub>2</sub> )H <sup>+</sup>               | Formic Acid              |
| 87.044  | (C <sub>4</sub> H <sub>6</sub> O <sub>2</sub> )H <sup>+</sup> | Butenoic acid            |
| 109.101 | (C <sub>8</sub> H <sub>12</sub> )H <sup>+</sup>               | Cyclooctadiene           |

**Supplementary table 2.** Participant list with demographic parameters

| ID | Age (years) | Sex | Height (cm) | Weight (Kg) | Smoker | High protein | Low protein |
|----|-------------|-----|-------------|-------------|--------|--------------|-------------|
| 1  | 30          | M   | 176         | 79          | Yes    | ✓            | ✓           |
| 2  | 29          | F   | 167         | 50          | No     | ✓            | ✓           |
| 3  | 27          | F   | 155         | 48          | No     | ✓            | ✓           |
| 4  | 24          | F   | 173         | 62          | No     | ✓            | ✓           |
| 5  | 30          | M   | 182         | 80          | No     | ✓            | ✓           |
| 6  | 29          | F   | 170         | 63          | No     | ✓            |             |
| 7  | 28          | M   | 174         | 70          | Yes    | ✓            |             |
| 8  | 27          | M   | 178         | 80          | No     | ✓            |             |
| 9  | 27          | F   | 167         | 72          | No     | ✓            | ✓           |
| 10 | 33          | M   | 168         | 64          | No     | ✓            |             |
| 11 | 36          | M   | 184         | 70          | No     | ✓            | ✓           |
| 12 | 47          | F   | 168         | 62          | No     |              | ✓           |
| 13 | 24          | M   | 186         | 85          | No     | ✓            | ✓           |
| 14 | 23          | M   | 177         | 69          | Yes    | ✓            |             |
| 15 | 27          | F   | 169         | 57          | No     | ✓            |             |
| 16 | 33          | F   | 165         | 72          | No     | ✓            | ✓           |
| 17 | 26          | F   | 167         | 59          | No     |              | ✓           |
